# Supplementary material for: Successive in situ synthesis of Ag/PA6 nanocomposites
Source: Royal Society of Chemistry journal article supplement (doi:10.1039/c4ra06555g), 2014-01-01
Supplement: c4ra06555g1.pdf [file c4ra06555g1.pdf]

## Support information

NMR samples were prepared by dissolving the purified CL and oxidizing CL caused by silver nitrate and oxygen to give a sample with concentration of 10mg/ml in CDCl<sub>3</sub>. Solution <sup>13</sup>C NMR spectra were collected on a VNMRS 600 MHz NMR. A 5-mm NMR probe was used with an average of 2,000 scans to give sufficient signal-to-noise signals. The chemical shift was recorded in relation to TMS.

**Figure. 1S** <sup>13</sup>C NMR spectra of pure CL (a) and CL after oxidation by silver nitrate (b) and oxygen (c).
